# Supplementary material
Source: publisher figshare collection journal article supplement (https://karger.figshare.com/ndownloader/files/27379313)
Supplement: Supplementary file 1 [file 27379313]

**Figure Legends:**

**Supplementary Figure 1:**

PD-L1 antigen expression (CPS) of 23 cases in pre- and post-operative biopsies (blue and red lines, respectively). The dashed lines divide the CPS levels into 3 clinical categories; <1, 1- <20, and ≥20.
